# Supplementary material for: Stable anode performance of an Sb–carbon nanocomposite in lithium-ion batteries and the effect of ball milling mode in the course of its preparation
Source: Royal Society of Chemistry journal article supplement (doi:10.1039/c3ta14643j), 2014-01-01
Supplement: c3ta14643j.pdf [file c3ta14643j.pdf]

## ELECTRONIC SUPPLEMENTARY INFORMATION

# Stable anode performance of an Sb-carbon nanocomposite in lithium-ion batteries and the effect of the ball milling mode in the course of its preparation

Thrinathreddy Ramireddy, Md Mokhlesur Rahman, Tan Xing, Ying Chen and Alexey M. Glushenkov\*

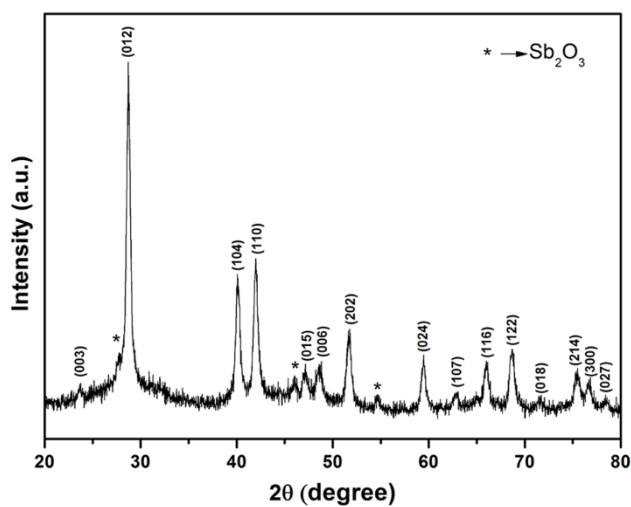

**Figure S1.** X-ray diffraction patterns of the sample obtained by ball milling mode D and annealed at 250° C for 1 hour in argon atmosphere. The diffraction peaks of the Sb phase are indexed and the positions of the Sb<sub>2</sub>O<sub>3</sub> peaks are marked with a star symbol.
